# Supplementary material for: Free carrier enhanced depletion in ZnO nanorods decorated with bimetallic AuPt nanoclusters
Source: Royal Society of Chemistry journal article supplement (doi:10.1039/d0nr04134c), 2020-01-01
Supplement: d0nr04134c1.pdf [file d0nr04134c1.pdf]

## SUPPLEMENTARY INFORMATION

### Free carrier enhanced depletion in ZnO nanorods decorated with bimetallic AuPt nanoclusters

R. Bahariqushchi<sup>1+</sup>, S. Cosentino<sup>1+</sup>, M. Scuderi<sup>2</sup>, E. Dumons<sup>3</sup>, L. P. Tran-Huu-Hue<sup>3</sup>, V. Strano<sup>4</sup>, D. Grandjean<sup>5</sup>, P. Lievens<sup>5</sup>, G. Poulin-Vittrant<sup>3</sup>, C. Spinella<sup>2</sup>, A. Terrasi<sup>1,6</sup>, G. Franzò<sup>1</sup>, and S. Mirabella<sup>1,6\*</sup>

<sup>1</sup> IMM-CNR, via S. Sofia 64, 95123 Catania, ITALY

<sup>2</sup> IMM-CNR, VIII strada 5, 95121 Catania, ITALY

<sup>3</sup> GREMAN UMR 7347 CNRS, INSA Centre Val de Loire, Université de Tours, 3 rue de la Chocolaterie, CS 23410, 41034 BLOIS cedex, France

<sup>4</sup> BRIT (Bio-nanotechResearchInnovationTower), Università degli Studi di Catania, via S. Sofia 89, 95123 Catania, Italy

<sup>5</sup> Quantum Solid State Physics, Department of Physics and Astronomy, KU Leuven, Celestijnenlaan 200D, B-3001 Leuven, Belgium

<sup>6</sup> Dipartimento di Fisica e Astronomia, Università di Catania, via S. Sofia 64, 95123 Catania, ITALY

+ Equal contribution, shared first authorship

\*corresponding author

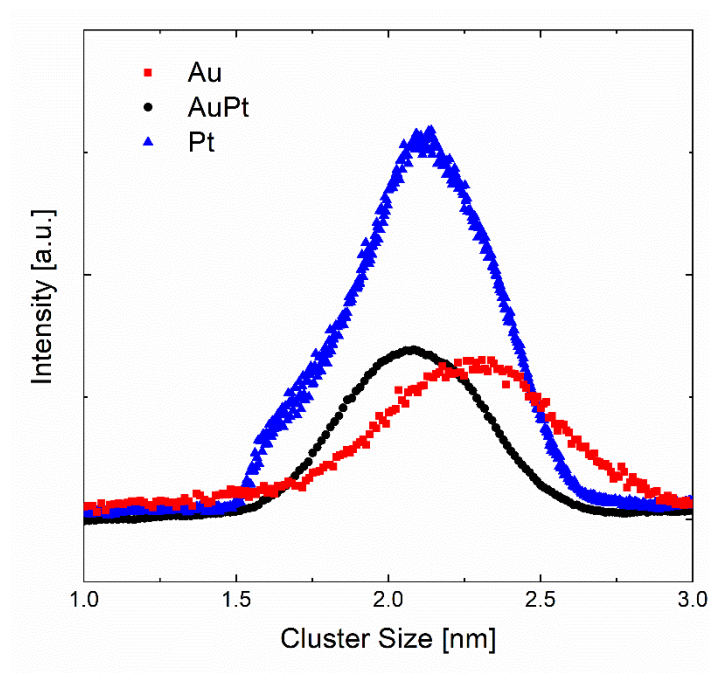

Figure S1: Cluster size distribution measured by reflection time of flight spectrometry for gas-phase clusters before deposition on the sample.

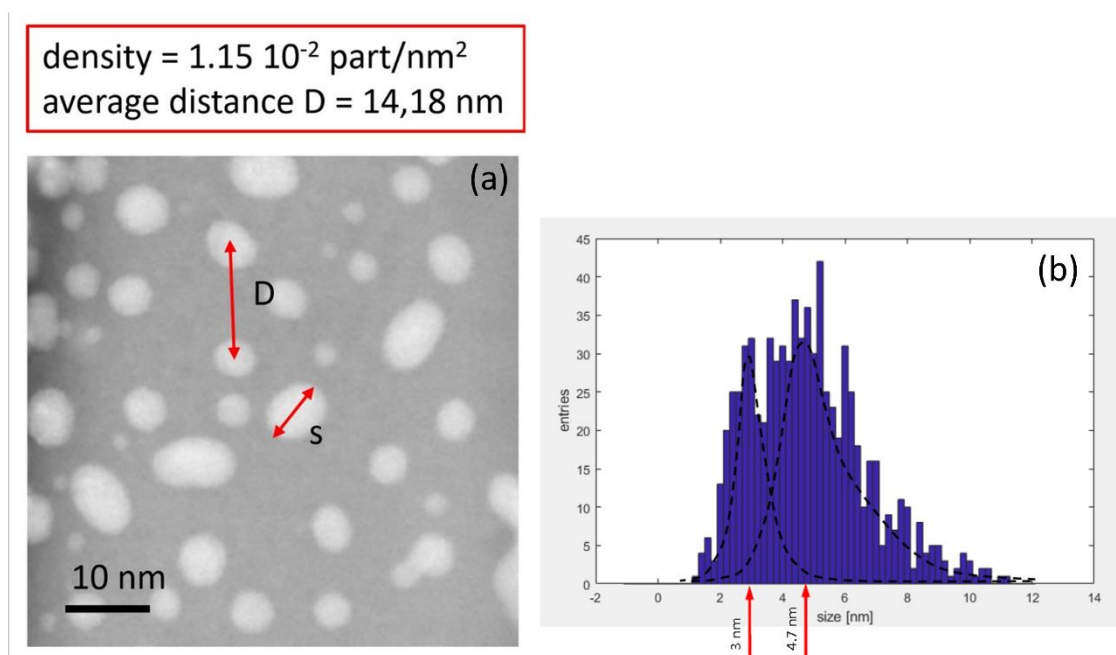

Figure S2: Representative high-resolution STEM micrograph used to determine size distribution and distance of Au clusters deposited on ZnO NR surface (a) and size distribution population of Au clusters (b).

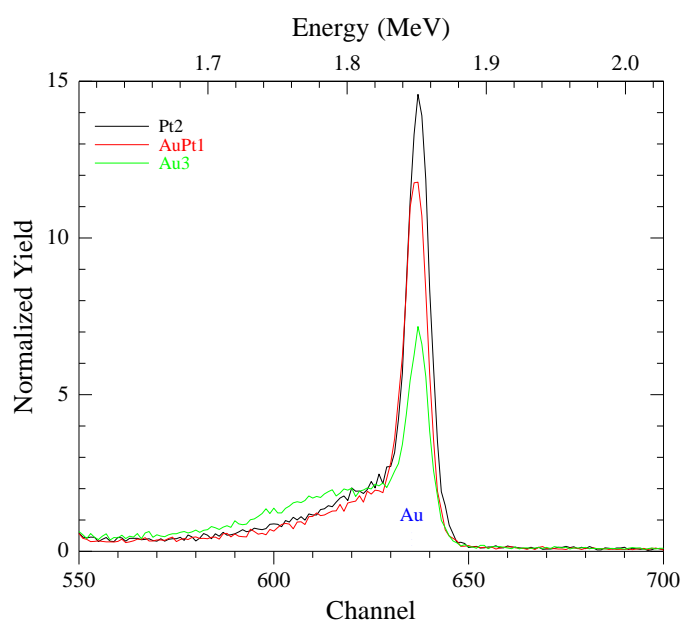

| Name  | Metal dose<br>[E15/cm <sup>2</sup> ] |
|-------|--------------------------------------|
| AuPt1 | <b>5.1±0.2</b>                       |
| Pt2   | <b>6.5±0.1</b>                       |
| Au3   | <b>3.0±0.2</b>                       |

Figure S3: RBS spectra of Au, Pt and AuPt clusters deposited on ZnO NRs. The area of the peaks in the 1.75 – 1.9 MeV gives the metal dose (in at/cm<sup>2</sup>) deposited.

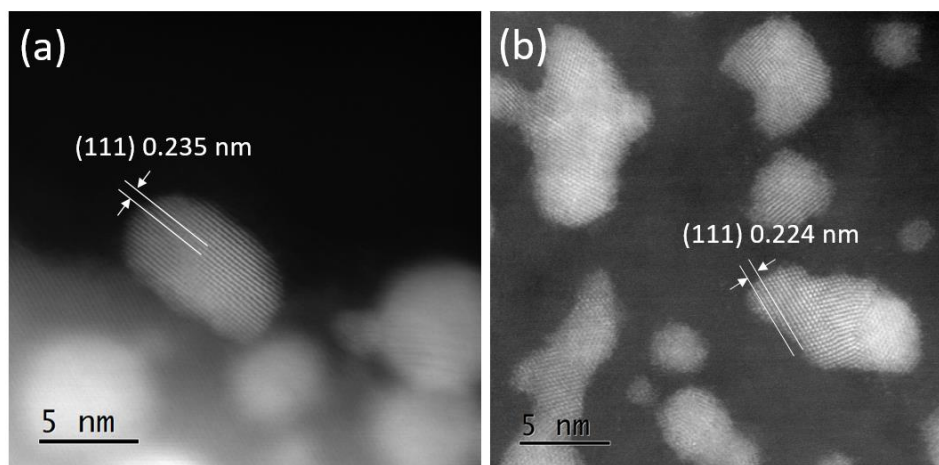

Figure S4: High resolution STEM micrographs for (a) Au and (b) Pt clusters. The measured inter-planar space for (111) planes are indicated.

To get a condition as close to the experimental one as possible we estimated the electric field to be applied to a single NR. The resistance measured for Au sample is about 1 G $\Omega$ , which would be that of a NR 10 nm long. If the experimental voltage of 0.8 V was applied to such a NR, the electric field would have been 80 V/m. Thus, a voltage bias of  $4 \cdot 10^{-5}$  V along the NR axis (500 nm long) is considered for resistance simulation. An equivalent resistance ( $R_{eq}$ ) for the NR is computed by extracting the current flowing along it, with Au clusters at different spacing values. For a bare ZnO NR the resistance ( $R_0$ ) results to be 39.8 k $\Omega$ , and it increases up to almost 3 times for 10 nm spaced Au clusters.

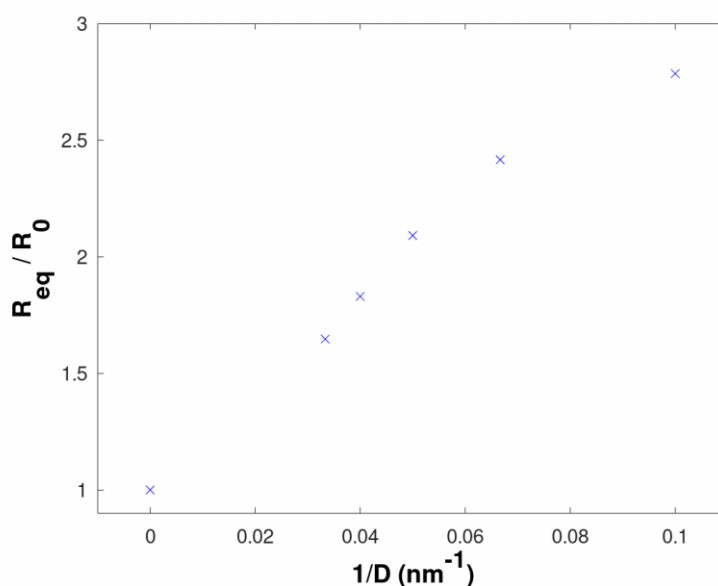

Figure S5: Simulation of the equivalent resistance of a NR with Au clusters spaced by D

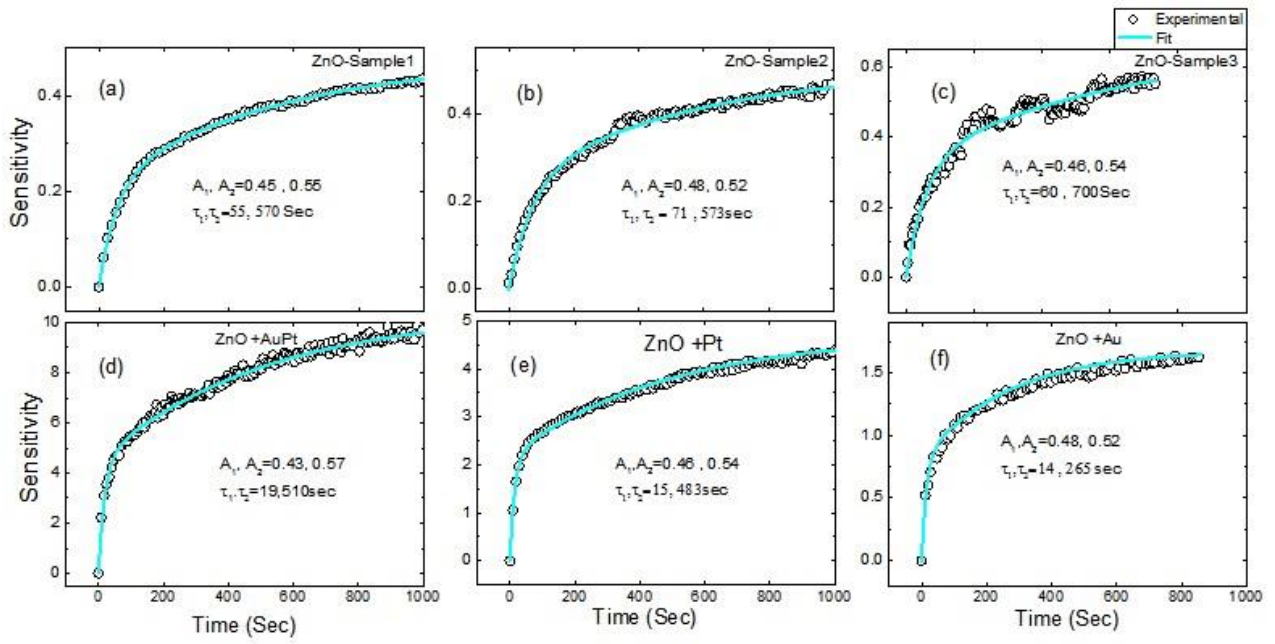

Figure S6: Numerical fit of the transient photocurrent curves for the pristine [(a) to (c)] ZnO NRs and decorated with AuPt (d), Pt (e) and Au (f) clusters.

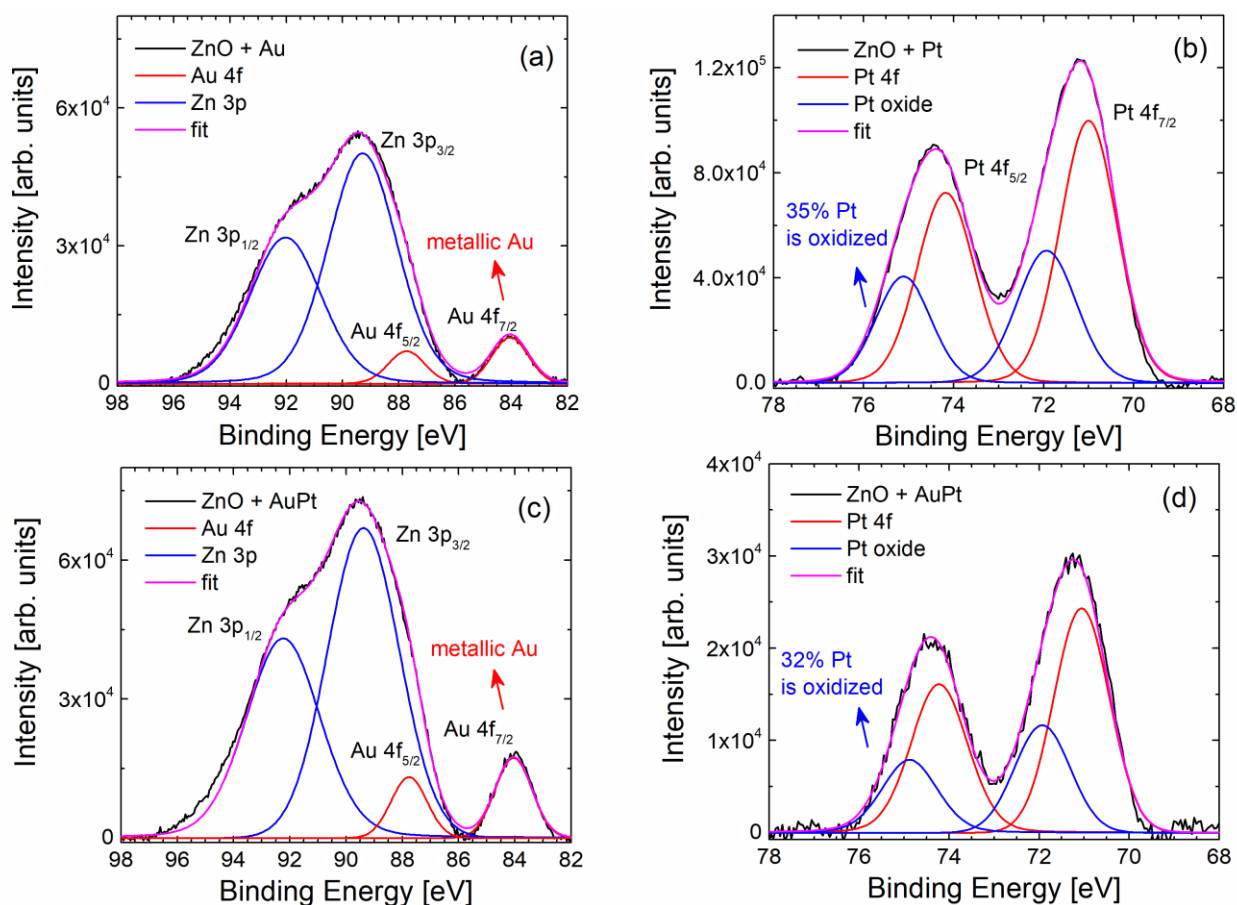

Figure S7: XPS spectra of Au and Pt region in decorated samples. Peaks were deconvoluted by taking into account the split-orbit separation of Au4f, Pt4f and Zn3p. Au clusters deposited on ZnO show no sign of oxidation. For Pt and AuPt on ZnO NRs, around 32-35% of the atoms are bonded with oxygen.

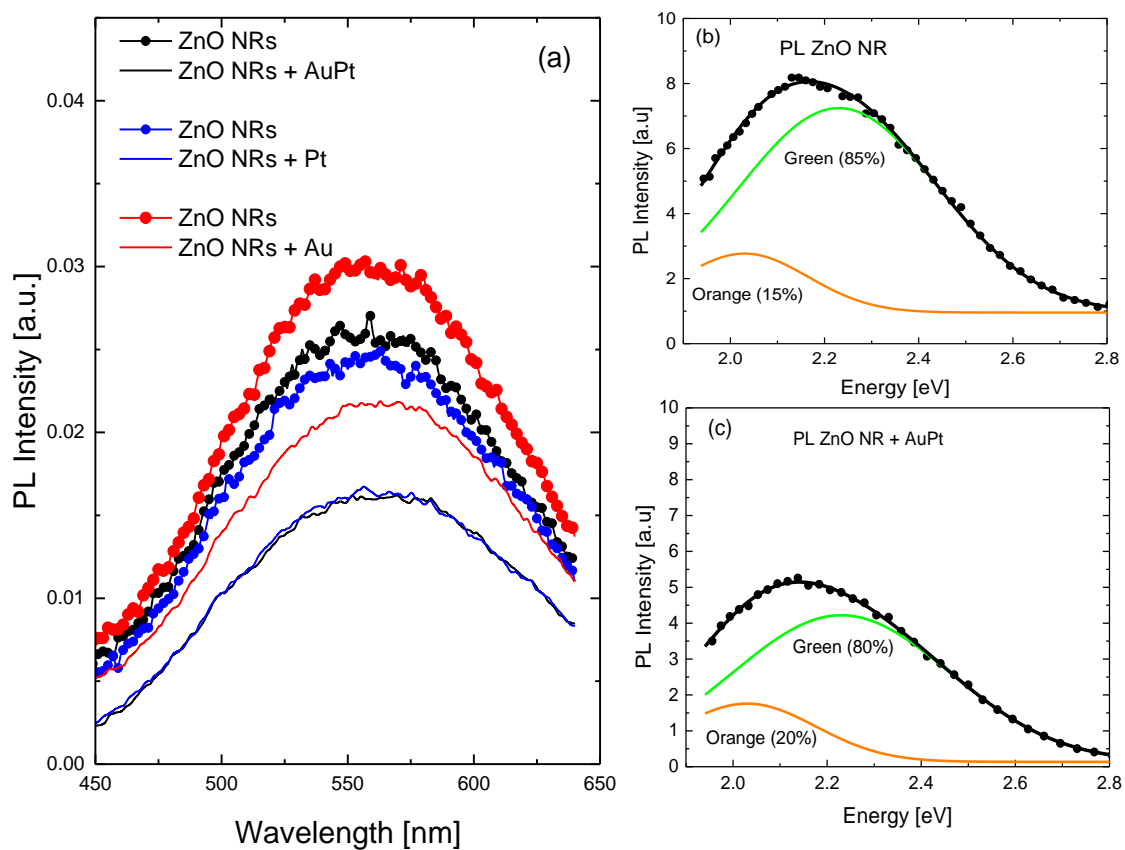

Figure S8. PL spectra in the visible region for pristine ZnO NRs and after cluster decoration (a). The two-component Gaussian fit shows that emission states (orange and green) in ZnO are not altered after cluster decoration.
